# Supplementary material for: Impact of flexible hexyl chain ordering in a mononuclear spin crossover iron(iii) complex
Source: Royal Society of Chemistry journal article supplement (doi:10.1039/d4dt00425f), 2024-01-01
Supplement: d4dt00425f1.pdf [file d4dt00425f1.pdf]

## Supporting Information

### Impact of flexible hexyl chain ordering in a mononuclear spin crossover iron(III) complex

Hiroaki Hagiwara,\* and Kento Sonoda

*Department of Chemistry, Faculty of Education, Gifu University, Yanagido 1-1, Gifu 501-1193, Japan*

#### Table of Contents

|                                                                                                                                                                                                                     |       |
|---------------------------------------------------------------------------------------------------------------------------------------------------------------------------------------------------------------------|-------|
| <b>Fig. S1</b> TG/DTA curve of [Fe(Hex-tnal) <sub>2</sub> ]BPh <sub>4</sub> ( <b>1</b> )                                                                                                                            | S2    |
| <b>Fig. S2</b> IR spectrum (KBr) of <b>1</b> at room temperature (RT)                                                                                                                                               | S2    |
| <b>Fig. S3</b> Experimental PXRD pattern of <b>1</b> at RT with the one calculated from the single-crystal X-ray data at 296 K                                                                                      | S3    |
| <b>Fig. S4</b> Temperature dependence of the $\chi_M T$ product over two consecutive thermal cycles for <b>1</b> at a sweep rate of 2 K min <sup>-1</sup> .                                                         | S3    |
| <b>Fig. S5</b> DSC curves of <b>1</b> collected in the cooling and heating modes at different scan rates (2, 5, 8, and 10 K min <sup>-1</sup> )                                                                     | S4    |
| <b>Table S1.</b> Peak top temperatures of the DSC curves for <b>1</b> at different scan rates                                                                                                                       | S4    |
| <b>Table S2.</b> X-ray crystallographic data for <b>1</b>                                                                                                                                                           | S5    |
| <b>Table S3.</b> Relevant coordination bond lengths (Å), angles (°), and structural parameters of <b>1</b>                                                                                                          | S6    |
| <b>Fig. S6</b> Temperature dependence of the HS molar fraction ( $\gamma_{HS}$ ) of <b>1</b> obtained from the magnetic susceptibility measurements, average Fe–N/O coordination bond length, and octahedral volume | S7    |
| <b>Table S4.</b> Atomic occupancy of C atoms (part A) of <i>n</i> -hexyl groups for <b>1</b>                                                                                                                        | S7    |
| <b>Table S5.</b> Definition of centroids (Cg) for aromatic rings of <b>1</b>                                                                                                                                        | S8    |
| <b>Table S6.</b> Intermolecular Cg...Cg distances (Å) of <b>1</b>                                                                                                                                                   | S9–10 |
| <b>Table S7.</b> Intermolecular CH...O contacts of <b>1</b>                                                                                                                                                         | S11   |
| <b>Table S8.</b> Intermolecular CH... $\pi$ hydrogen bond geometries of <b>1</b>                                                                                                                                    | S12   |
| <b>References</b>                                                                                                                                                                                                   | S13   |

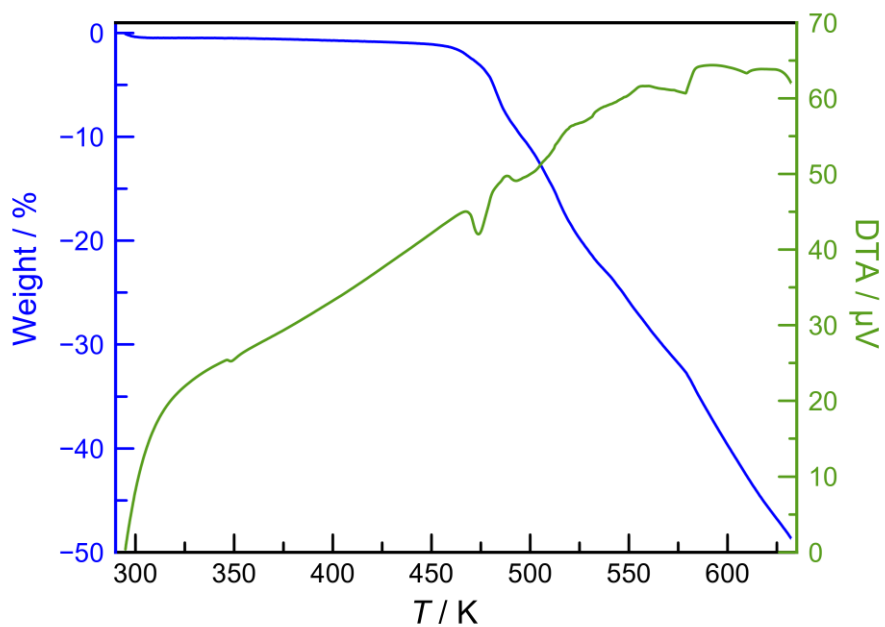

**Fig. S1** TG/DTA curve of  $[\text{Fe}(\text{Hex-tnal})_2]\text{BPh}_4$  (**1**).

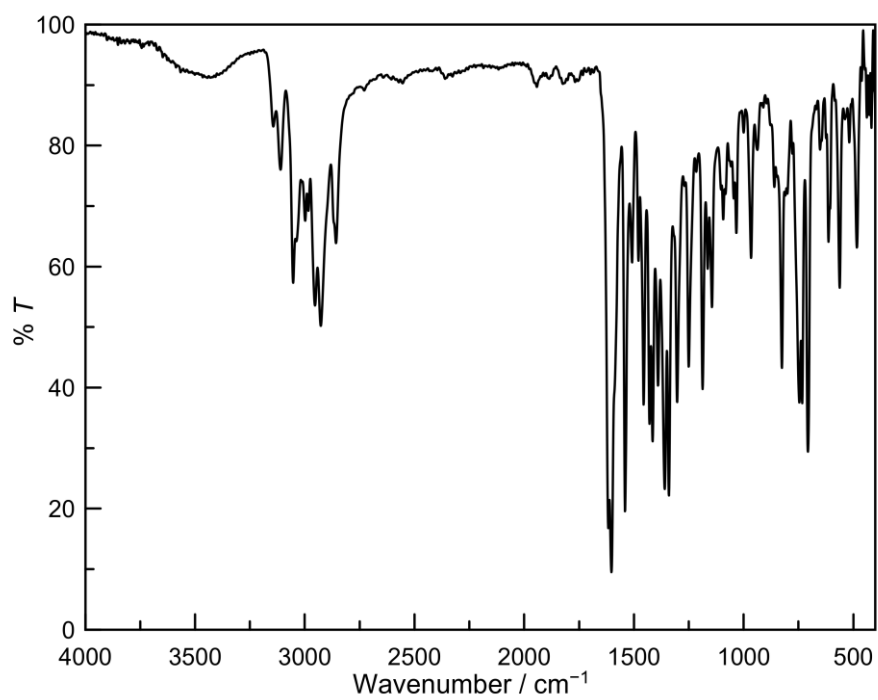

**Fig. S2** IR spectrum (KBr) of **1** at room temperature (RT).

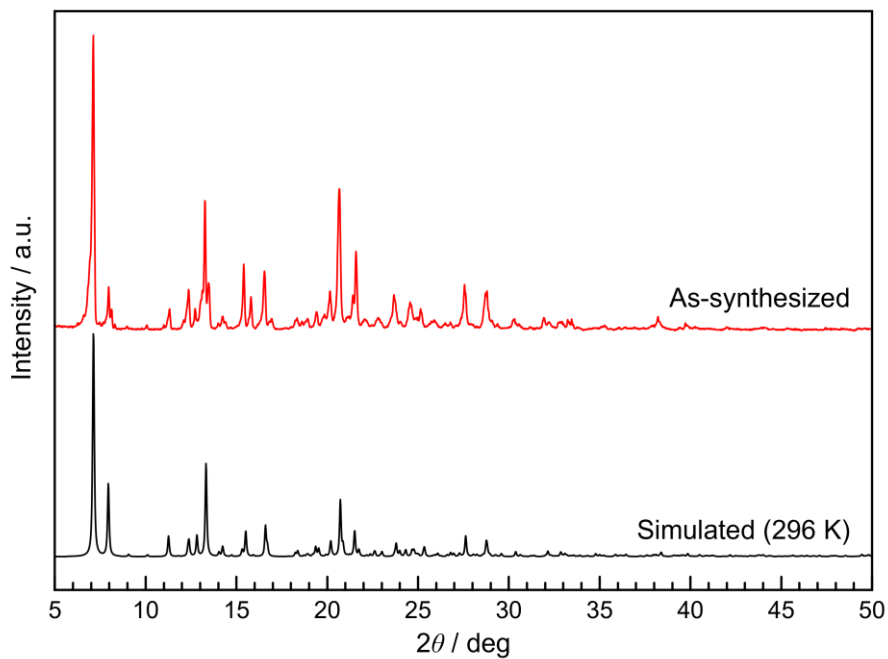

**Fig. S3** Experimental PXR pattern of **1** (red) at RT with the one calculated from the single-crystal X-ray data at 296 K (gray).

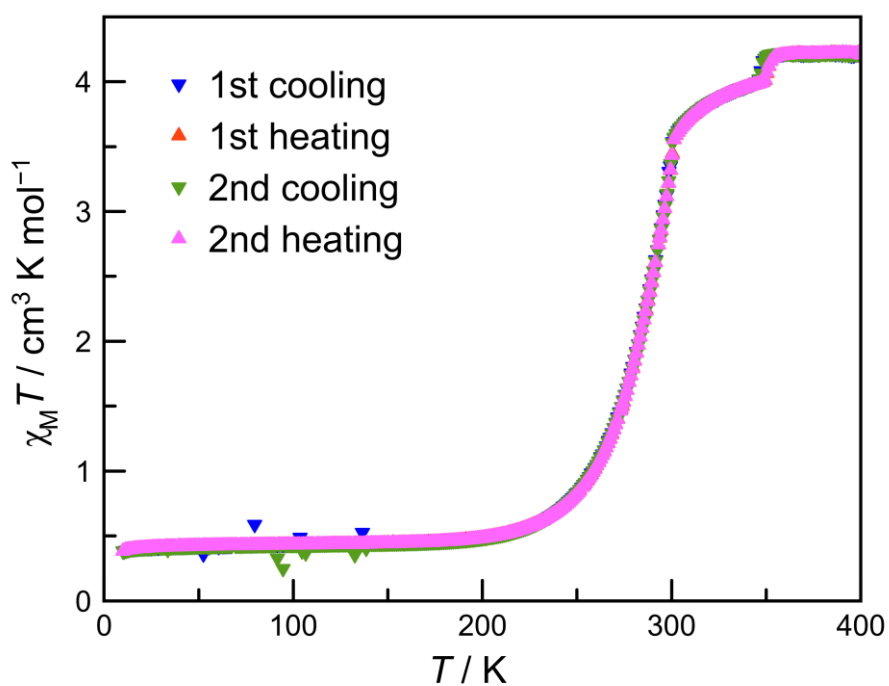

**Fig. S4** Temperature dependence of the  $\chi_M T$  product over two consecutive thermal cycles for **1** at a sweep rate of  $2 \text{ K min}^{-1}$ .

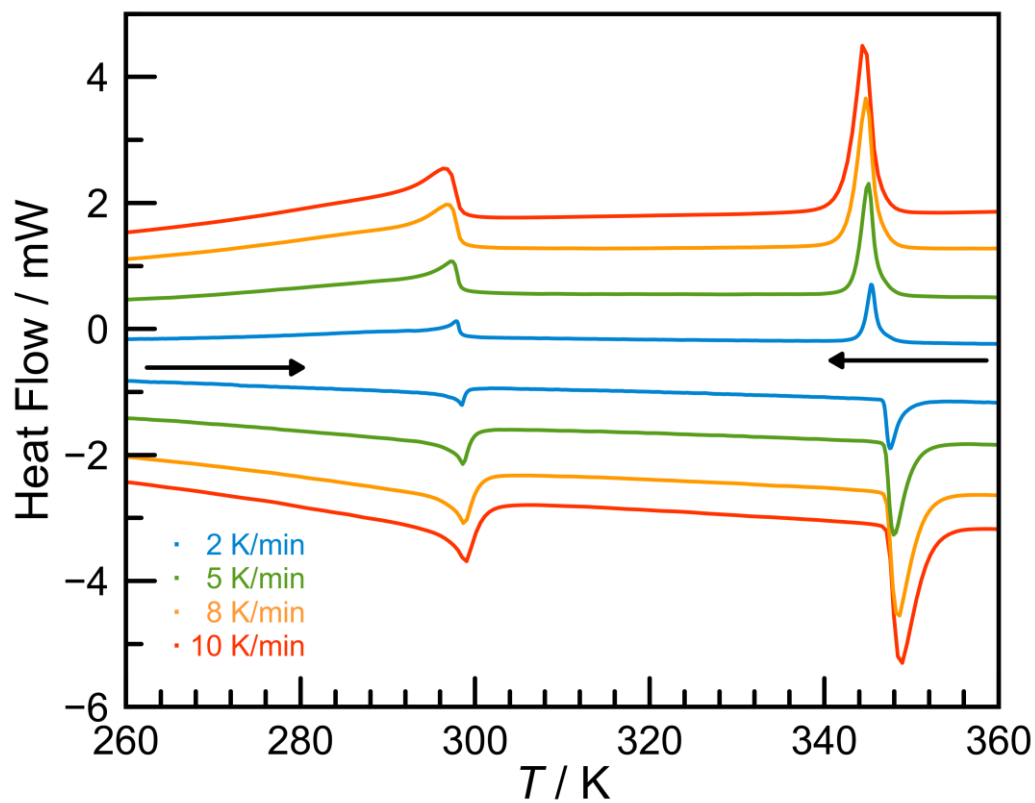

**Fig. S5** DSC curves of **1** collected in the cooling and heating modes at different scan rates (2, 5, 8, and 10 K min<sup>-1</sup>).

**Table S1.** Peak top temperatures of the DSC curves for **1** at different scan rates

| Scan rate, K min <sup>-1</sup> | $T_{c1\downarrow}$ , K | $T_{c1\uparrow}$ , K | $T_{c2\downarrow}$ , K | $T_{c2\uparrow}$ , K |
|--------------------------------|------------------------|----------------------|------------------------|----------------------|
| 2                              | 298                    | 298                  | 345                    | 347                  |
| 5                              | 297                    | 298                  | 344                    | 347                  |
| 8                              | 295                    | 298                  | 344                    | 348                  |
| 10                             | 295                    | 299                  | 344                    | 348                  |

**Table S2.** X-ray crystallographic data for **1**

| <i>T</i> , K                                                               | 100                                                              | 175                | 250                | 275                | 296                  | 310                  | 325                  | 340                  | 360                |
|----------------------------------------------------------------------------|------------------------------------------------------------------|--------------------|--------------------|--------------------|----------------------|----------------------|----------------------|----------------------|--------------------|
| Formula                                                                    | C <sub>64</sub> H <sub>66</sub> BFeN <sub>8</sub> O <sub>2</sub> |                    |                    |                    |                      |                      |                      |                      |                    |
| Formula weight                                                             | 1045.90                                                          |                    |                    |                    |                      |                      |                      |                      |                    |
| Crystal system                                                             | Triclinic                                                        | Triclinic          | Triclinic          | Triclinic          | Monoclinic           | Monoclinic           | Monoclinic           | Monoclinic           | Triclinic          |
| Space group                                                                | <i>P</i> $\bar{1}$                                               | <i>P</i> $\bar{1}$ | <i>P</i> $\bar{1}$ | <i>P</i> $\bar{1}$ | <i>C</i> 2/ <i>c</i> | <i>C</i> 2/ <i>c</i> | <i>C</i> 2/ <i>c</i> | <i>C</i> 2/ <i>c</i> | <i>P</i> $\bar{1}$ |
| <i>a</i> , Å                                                               | 14.2177(4)                                                       | 14.2646(3)         | 14.3314(4)         | 14.3772(4)         | 14.8678(6)           | 14.8931(6)           | 14.9017(6)           | 14.9243(7)           | 13.9178(3)         |
| <i>b</i> , Å                                                               | 14.4364(4)                                                       | 14.5053(3)         | 14.6187(5)         | 14.6177(5)         | 24.8747(9)           | 24.8823(9)           | 24.8537(9)           | 24.8378(10)          | 14.1124(3)         |
| <i>c</i> , Å                                                               | 15.8796(4)                                                       | 15.9520(2)         | 16.0247(3)         | 16.1449(3)         | 16.3510(5)           | 16.3989(5)           | 16.4274(5)           | 16.4756(5)           | 17.1203(3)         |
| $\alpha$ , deg                                                             | 75.742(3)                                                        | 75.861(2)          | 98.737(2)          | 98.821(2)          | 90                   | 90                   | 90                   | 90                   | 96.939(2)          |
| $\beta$ , deg                                                              | 85.560(2)                                                        | 84.957(2)          | 95.692(2)          | 96.291(2)          | 106.187(4)           | 106.285(4)           | 106.331(4)           | 106.339(4)           | 98.241(2)          |
| $\gamma$ , deg                                                             | 61.152(3)                                                        | 60.854(2)          | 119.179(3)         | 118.781(3)         | 90                   | 90                   | 90                   | 90                   | 115.296(2)         |
| <i>V</i> , Å <sup>3</sup>                                                  | 2763.62(15)                                                      | 2793.53(10)        | 2838.25(16)        | 2872.06(16)        | 5807.4(4)            | 5833.2(4)            | 5838.6(4)            | 5860.6(4)            | 2945.89(11)        |
| <i>Z</i>                                                                   | 2                                                                | 2                  | 2                  | 2                  | 4                    | 4                    | 4                    | 4                    | 2                  |
| <i>T</i> , K                                                               | 100(2)                                                           | 175(2)             | 250(2)             | 275(2)             | 296(2)               | 310(2)               | 325(2)               | 340(2)               | 360(2)             |
| $\mu$ (Mo K $\alpha$ ), mm <sup>-1</sup>                                   | 0.325                                                            | 0.322              | 0.317              | 0.313              | 0.310                | 0.308                | 0.308                | 0.307                | 0.305              |
| <i>d</i> <sub>calcd.</sub> , g cm <sup>-3</sup>                            | 1.257                                                            | 1.243              | 1.224              | 1.209              | 1.196                | 1.191                | 1.190                | 1.185                | 1.179              |
| Reflections collected                                                      | 23406                                                            | 24767              | 25421              | 25823              | 25309                | 25336                | 25461                | 25526                | 25263              |
| Independent reflections                                                    | 14467                                                            | 14789              | 15085              | 15240              | 8018                 | 8032                 | 8052                 | 8084                 | 15492              |
| <i>R</i> <sub>int</sub>                                                    | 0.0170                                                           | 0.0155             | 0.0188             | 0.0225             | 0.0166               | 0.0169               | 0.0167               | 0.0172               | 0.0108             |
| <i>R</i> <sub>1</sub> <sup>a</sup> ( <i>I</i> > 2 $\sigma$ ( <i>I</i> ))   | 0.0563                                                           | 0.0622             | 0.0612             | 0.0690             | 0.0501               | 0.0484               | 0.0487               | 0.0500               | 0.0555             |
| <i>R</i> <sub>1</sub> <sup>a</sup> (all data)                              | 0.0669                                                           | 0.0744             | 0.0830             | 0.0977             | 0.0675               | 0.0663               | 0.0694               | 0.0750               | 0.0763             |
| w <i>R</i> <sub>2</sub> <sup>b</sup> ( <i>I</i> > 2 $\sigma$ ( <i>I</i> )) | 0.1545                                                           | 0.1641             | 0.1603             | 0.1928             | 0.1389               | 0.1356               | 0.1338               | 0.1366               | 0.1594             |
| w <i>R</i> <sub>2</sub> <sup>b</sup> (all data)                            | 0.1602                                                           | 0.1705             | 0.1726             | 0.2126             | 0.1521               | 0.1488               | 0.1496               | 0.1550               | 0.1803             |
| <i>S</i>                                                                   | 1.129                                                            | 1.154              | 1.103              | 1.091              | 1.042                | 1.048                | 1.027                | 1.023                | 1.036              |
| CCDC number                                                                | 2331987                                                          | 2331988            | 2331989            | 2331990            | 2331991              | 2331992              | 2331993              | 2331994              | 2331995            |

<sup>a</sup>  $R_1 = \sum ||F_o| - |F_c|| / \sum |F_o|$ .

<sup>b</sup>  $wR_2 = [\sum w(|F_o|^2 - |F_c|^2)^2 / \sum w|F_o|^2]^{1/2}$ .

**Table S3.** Relevant coordination bond lengths (Å), angles (°), and structural parameters of **1**

| <i>T</i> , K                                       | 100               | 175        | 250        | 275       | 296        | 310        | 325        | 340        | 360        |
|----------------------------------------------------|-------------------|------------|------------|-----------|------------|------------|------------|------------|------------|
|                                                    | Bond Lengths (Å)  |            |            |           |            |            |            |            |            |
| Fe1–O1                                             | 1.8720(16)        | 1.8707(18) | 1.8688(17) | 1.876(2)  | 1.9025(13) | 1.9045(12) | 1.9053(12) | 1.9053(13) | 1.9095(14) |
| Fe1–O2 (Fe1–O1*) <sup>a</sup>                      | 1.8789(16)        | 1.8767(17) | 1.8719(17) | 1.877(2)  | 1.9026(13) | 1.9045(12) | 1.9052(12) | 1.9054(13) | 1.9080(15) |
| Fe1–N3                                             | 1.9481(19)        | 1.949(2)   | 1.969(2)   | 2.018(2)  | 2.0955(15) | 2.1065(14) | 2.1114(15) | 2.1178(15) | 2.1531(17) |
| Fe1–N4                                             | 1.9347(18)        | 1.940(2)   | 1.9498(18) | 2.002(2)  | 2.0862(13) | 2.0950(12) | 2.1002(12) | 2.1044(13) | 2.1060(14) |
| Fe1–N7 (Fe1–N3*) <sup>a</sup>                      | 1.9525(19)        | 1.951(2)   | 1.9676(19) | 2.016(2)  | 2.0956(15) | 2.1065(14) | 2.1115(15) | 2.1179(15) | 2.1436(18) |
| Fe1–N8 (Fe1–N4*) <sup>a</sup>                      | 1.9363(18)        | 1.9393(19) | 1.9473(18) | 1.996(2)  | 2.0862(13) | 2.0951(12) | 2.1003(12) | 2.1044(13) | 2.1159(15) |
| Average Fe–O (Fe–O <sub>ave</sub> )                | 1.875             | 1.874      | 1.870      | 1.877     | 1.903      | 1.905      | 1.905      | 1.905      | 1.909      |
| Average Fe–N (Fe–N <sub>ave</sub> )                | 1.943             | 1.945      | 1.958      | 2.008     | 2.091      | 2.101      | 2.106      | 2.111      | 2.130      |
| Average Fe–N/O (Fe–N/O <sub>ave</sub> )            | 1.920             | 1.921      | 1.929      | 1.964     | 2.028      | 2.035      | 2.039      | 2.043      | 2.056      |
|                                                    | Bond Angles (deg) |            |            |           |            |            |            |            |            |
| O1–Fe1–O2 (O1–Fe1–O1*) <sup>a</sup>                | 95.03(7)          | 94.95(8)   | 95.33(8)   | 96.49(9)  | 97.96(8)   | 98.13(8)   | 98.21(8)   | 98.31(9)   | 98.40(7)   |
| O1–Fe1–N3                                          | 172.35(7)         | 172.32(8)  | 171.23(8)  | 167.85(9) | 162.24(5)  | 161.67(5)  | 161.31(5)  | 160.96(6)  | 161.15(6)  |
| O1–Fe1–N4                                          | 93.42(7)          | 93.44(8)   | 92.68(8)   | 90.72(9)  | 86.81(5)   | 86.46(5)   | 86.25(5)   | 86.04(5)   | 85.83(6)   |
| O1–Fe1–N7 (O1–Fe1–N3*) <sup>a</sup>                | 90.31(7)          | 90.28(8)   | 90.20(8)   | 90.37(10) | 91.61(6)   | 91.71(6)   | 91.79(6)   | 91.88(6)   | 92.04(7)   |
| O1–Fe1–N8 (O1–Fe1–N4*) <sup>a</sup>                | 86.71(7)          | 87.06(8)   | 88.13(8)   | 91.12(9)  | 97.29(5)   | 97.83(5)   | 98.18(5)   | 98.52(5)   | 97.16(6)   |
| O2–Fe1–N3 (O1*–Fe1–N3) <sup>a</sup>                | 91.10(7)          | 91.04(8)   | 91.03(8)   | 91.21(10) | 91.61(6)   | 91.71(6)   | 91.80(6)   | 91.88(6)   | 91.22(7)   |
| O2–Fe1–N4 (O1*–Fe1–N4) <sup>a</sup>                | 88.67(7)          | 88.45(8)   | 89.13(8)   | 92.05(9)  | 97.29(5)   | 97.83(5)   | 98.18(5)   | 98.52(5)   | 103.79(6)  |
| O2–Fe1–N7 (O1*–Fe1–N3*) <sup>a</sup>               | 172.36(7)         | 172.51(8)  | 171.54(8)  | 168.25(9) | 162.24(5)  | 161.67(5)  | 161.31(5)  | 160.96(6)  | 159.51(6)  |
| O2–Fe1–N8 (O1*–Fe1–N4*) <sup>a</sup>               | 92.36(7)          | 92.54(8)   | 92.14(7)   | 90.44(9)  | 86.81(5)   | 86.46(5)   | 86.25(5)   | 86.04(5)   | 85.48(6)   |
| N3–Fe1–N4                                          | 82.12(8)          | 81.90(8)   | 81.36(8)   | 79.59(9)  | 77.12(5)   | 76.87(5)   | 76.68(5)   | 76.53(6)   | 76.11(6)   |
| N3–Fe1–N7 (N3–Fe1–N3*) <sup>a</sup>                | 84.05(8)          | 84.23(9)   | 84.19(8)   | 83.70(10) | 83.36(9)   | 83.30(9)   | 83.27(9)   | 83.19(9)   | 84.13(7)   |
| N3–Fe1–N8 (N3–Fe1–N4*) <sup>a</sup>                | 97.64(8)          | 97.49(8)   | 97.68(8)   | 98.23(9)  | 98.16(6)   | 98.19(5)   | 98.19(5)   | 98.19(6)   | 99.74(7)   |
| N4–Fe1–N7 (N4–Fe1–N3*) <sup>a</sup>                | 96.47(8)          | 96.61(8)   | 97.02(8)   | 97.40(9)  | 98.16(6)   | 98.19(5)   | 98.19(5)   | 98.19(6)   | 94.47(7)   |
| N4–Fe1–N8 (N4–Fe1–N4*) <sup>a</sup>                | 178.95(8)         | 178.86(8)  | 178.43(8)  | 176.72(9) | 173.78(8)  | 173.49(7)  | 173.26(7)  | 173.07(8)  | 169.79(7)  |
| N7–Fe1–N8 (N3*–Fe1–N4*) <sup>a</sup>               | 82.48(8)          | 82.36(8)   | 81.63(8)   | 79.87(9)  | 77.12(5)   | 76.87(5)   | 76.68(5)   | 76.53(6)   | 75.72(7)   |
| $\Sigma^b$                                         | 52.31             | 52.35      | 51.64      | 54.86     | 80.86      | 83.63      | 85.43      | 87.17      | 89.54      |
| $\Theta^c$                                         | 150.79            | 150.71     | 160.15     | 191.05    | 254.42     | 261.38     | 265.96     | 269.92     | 291.42     |
| Octahedral volume ( $V_{\text{Oh}}$ ) <sup>d</sup> | 9.325             | 9.333      | 9.442      | 9.926     | 10.804     | 10.902     | 10.950     | 10.996     | 11.176     |

Symmetry operation: (\*), 1–X, Y, 3/2–Z.

<sup>a</sup> The label in parentheses indicates the data at 296, 310, 325, and 340 K.<sup>b</sup>  $\Sigma$  = the sum of  $|90 - \phi|$  for the 12 *cis* N/O–Fe–N/O angles in the octahedral coordination sphere<sup>S1</sup> calculated using the program OctaDist.<sup>S2</sup><sup>c</sup>  $\Theta$  = the sum of  $|60 - \theta|$  for the 24 N/O–Fe–N/O angles describing the trigonal twist angles<sup>S3</sup> calculated using the program OctaDist.<sup>S2</sup><sup>d</sup> Calculated using the program OLEX2.<sup>S4</sup>

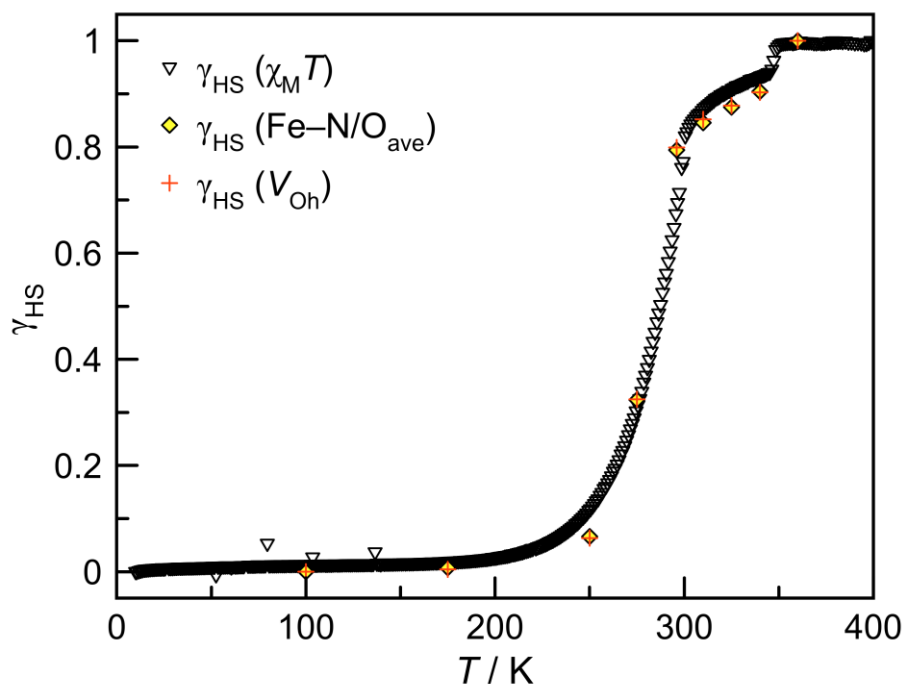

**Fig. S6** Temperature dependence of the HS molar fraction ( $\gamma_{\text{HS}}$ ) of **1** obtained from the magnetic susceptibility measurements (black inverted triangles), average Fe–N/O coordination bond length (Fe–N/O<sub>ave</sub>, yellow diamonds), and octahedral volume ( $V_{\text{Oh}}$ , red cross).

**Table S4.** Atomic occupancy of C atoms (part A) of *n*-hexyl groups for **1**

| <i>T</i> , K       | 100 | 175      | 250      | 275       | 296      | 310      | 325      | 340      | 360 |
|--------------------|-----|----------|----------|-----------|----------|----------|----------|----------|-----|
| C1A                | n/a | n/a      | n/a      | n/a       | 0.653(5) | 0.658(5) | 0.663(5) | 0.653(5) | n/a |
| C2A                | n/a | n/a      | n/a      | n/a       | 0.653(5) | 0.658(5) | 0.663(5) | 0.653(5) | n/a |
| C3A                | n/a | n/a      | 0.497(8) | 0.645(12) | 0.653(5) | 0.658(5) | 0.663(5) | 0.653(5) | n/a |
| C1A <sup>*,a</sup> | n/a | n/a      | n/a      | n/a       | 0.653(5) | 0.658(5) | 0.663(5) | 0.653(5) | n/a |
| C2A <sup>*,a</sup> | n/a | n/a      | n/a      | n/a       | 0.653(5) | 0.658(5) | 0.663(5) | 0.653(5) | n/a |
| C3A <sup>*,a</sup> | n/a | n/a      | n/a      | n/a       | 0.653(5) | 0.658(5) | 0.663(5) | 0.653(5) | n/a |
| C21A               | n/a | n/a      | 0.717(7) | 0.726(10) | n/a      | n/a      | n/a      | n/a      | n/a |
| C22A               | n/a | n/a      | 0.717(7) | 0.726(10) | n/a      | n/a      | n/a      | n/a      | n/a |
| C23A               | n/a | 0.742(5) | n/a      | n/a       | n/a      | n/a      | n/a      | n/a      | n/a |
| C24A               | n/a | 0.742(5) | 0.599(5) | 0.585(6)  | n/a      | n/a      | n/a      | n/a      | n/a |
| C25A               | n/a | 0.742(5) | 0.599(5) | 0.585(6)  | n/a      | n/a      | n/a      | n/a      | n/a |

Symmetry operation: (\*), 1–X, Y, 3/2–Z.

<sup>a</sup> At 296, 310, 325, and 340 K.

**Table S5.** Definition of centroids (Cg) for aromatic rings of **1<sup>S5</sup>**

| <i>T</i> , K  | Component          | Ring      | Ring size   | Centroid   | Related atoms                           |                         |
|---------------|--------------------|-----------|-------------|------------|-----------------------------------------|-------------------------|
| 100, 360      | Cation             | Chelate   | 5-Membered  | Cg1        | Fe1–N3–C8–C9–N4                         |                         |
|               |                    | Chelate   | 5-Membered  | Cg2        | Fe1–N7–C28–C29–N8                       |                         |
|               |                    | Triazolyl | 5-Membered  | Cg3        | N1–N2–N3–C8–C7                          |                         |
|               |                    | Triazolyl | 5-Membered  | Cg4        | N5–N6–N7–C28–C27                        |                         |
|               |                    | Chelate   | 6-Membered  | Cg5        | Fe1–O1–C20–C11–C10–N4                   |                         |
|               |                    | Chelate   | 6-Membered  | Cg6        | Fe1–O2–C40–C31–C30–N8                   |                         |
|               |                    | Naphthyl  | 6-Membered  | Cg7        | C11–C12–C17–C18–C19–C20                 |                         |
|               |                    | Naphthyl  | 6-Membered  | Cg8        | C12–C13–C14–C15–C16–C17                 |                         |
|               |                    | Naphthyl  | 6-Membered  | Cg9        | C31–C32–C37–C38–C39–C40                 |                         |
|               |                    | Naphthyl  | 6-Membered  | Cg10       | C32–C33–C34–C35–C36–C37                 |                         |
|               |                    | Naphthyl  | 10-Membered | Cg11       | C11–C12–C13–C14–C15–C16–C17–C18–C19–C20 |                         |
|               |                    | Naphthyl  | 10-Membered | Cg12       | C31–C32–C33–C34–C35–C36–C37–C38–C39–C40 |                         |
|               | Anion              | Phenyl    | 6-Membered  | Cg13       | C41–C42–C43–C44–C45–C46                 |                         |
|               |                    | Phenyl    | 6-Membered  | Cg14       | C47–C48–C49–C50–C51–C52                 |                         |
|               |                    | Phenyl    | 6-Membered  | Cg15       | C53–C54–C55–C56–C57–C58                 |                         |
|               |                    | Phenyl    | 6-Membered  | Cg16       | C59–C60–C61–C62–C63–C64                 |                         |
| 175, 250, 275 | Cation             | Chelate   | 5-Membered  | Cg1        | Fe1–N3–C8–C9–N4                         |                         |
|               |                    | Chelate   | 5-Membered  | Cg2        | Fe1–N7–C28–C29–N8                       |                         |
|               |                    | Triazolyl | 5-Membered  | Cg3        | N1–N2–N3–C8–C7                          |                         |
|               |                    | Triazolyl | 5-Membered  | Cg4        | N5–N6–N7–C28–C27                        |                         |
|               |                    | Chelate   | 6-Membered  | Cg5        | Fe1–O1–C20–C11–C10–N4                   |                         |
|               |                    | Chelate   | 6-Membered  | Cg6        | Fe1–O2–C40–C31–C30–N8                   |                         |
|               |                    | Naphthyl  | 6-Membered  | Cg7        | C11–C12–C17–C18–C19–C20                 |                         |
|               |                    | Naphthyl  | 6-Membered  | Cg8        | C12–C13–C14–C15–C16–C17                 |                         |
|               |                    | Naphthyl  | 6-Membered  | Cg9        | C31–C32–C37–C38–C39–C40                 |                         |
|               |                    | Naphthyl  | 6-Membered  | Cg10       | C32–C33–C34–C35–C36–C37                 |                         |
|               |                    | Anion     | Phenyl      | 6-Membered | Cg11                                    | C41–C42–C43–C44–C45–C46 |
|               |                    |           | Phenyl      | 6-Membered | Cg12                                    | C47–C48–C49–C50–C51–C52 |
|               | Phenyl             |           | 6-Membered  | Cg13       | C53–C54–C55–C56–C57–C58                 |                         |
|               | Phenyl             |           | 6-Membered  | Cg14       | C59–C60–C61–C62–C63–C64                 |                         |
|               | 296, 310, 325, 340 | Cation    | Chelate     | 5-Membered | Cg1                                     | Fe1–N3–C8–C9–N4         |
|               |                    |           | Chelate     | 5-Membered | Cg2                                     | Fe1–N3*–C8*–C9*–N4*     |
| Triazolyl     |                    |           | 5-Membered  | Cg3        | N1–N2–N3–C8–C7                          |                         |
| Chelate       |                    |           | 6-Membered  | Cg4        | Fe1–O1–C20–C11–C10–N4                   |                         |
| Chelate       |                    |           | 6-Membered  | Cg5        | Fe1–O1*–C20*–C11*–C10*–N4*              |                         |
| Naphthyl      |                    |           | 6-Membered  | Cg6        | C11–C12–C17–C18–C19–C20                 |                         |
| Naphthyl      |                    |           | 6-Membered  | Cg7        | C12–C13–C14–C15–C16–C17                 |                         |
| Anion         |                    | Phenyl    | 6-Membered  | Cg8        | C21–C22–C23–C24–C25–C26                 |                         |
|               |                    | Phenyl    | 6-Membered  | Cg9        | C27–C28–C29–C30–C31–C32                 |                         |

Symmetry operation: (\*), 1–X, Y, 3/2–Z.



**Table S6.** Intermolecular Cg $\cdots$ Cg distances (Å) of **1**

| <i>T</i> , K | $\pi\cdots\pi$                 | Cg $\cdots$ Cg, Å | Symmetry code |
|--------------|--------------------------------|-------------------|---------------|
| 100          | Cg3 $\cdots$ Cg13              | 3.4974(16)        | X, Y, Z       |
|              | Cg4 $\cdots$ Cg15              | 3.5927(14)        | X, 1+Y, Z     |
|              | Cg7 $\cdots$ Cg8               | 3.7245(18)        | -X, 2-Y, 1-Z  |
|              | Cg8 $\cdots$ Cg7               | 3.7245(18)        | -X, 2-Y, 1-Z  |
|              | Cg8 $\cdots$ Cg8               | 3.4927(16)        | -X, 2-Y, 1-Z  |
|              | Cg9 $\cdots$ Cg10 <sup>a</sup> | 4.3345(14)        | -X, 2-Y, 2-Z  |
|              | Cg10 $\cdots$ Cg9 <sup>a</sup> | 4.3346(14)        | -X, 2-Y, 2-Z  |
|              | Cg10 $\cdots$ Cg10             | 3.5818(14)        | -X, 2-Y, 2-Z  |
|              | Cg13 $\cdots$ Cg3              | 3.4975(16)        | X, Y, Z       |
|              | Cg15 $\cdots$ Cg4              | 3.5928(14)        | X, -1+Y, Z    |
| 175          | Cg3 $\cdots$ Cg11              | 3.5179(19)        | X, Y, Z       |
|              | Cg4 $\cdots$ Cg13              | 3.6148(17)        | X, 1+Y, Z     |
|              | Cg7 $\cdots$ Cg8               | 3.777(2)          | -X, 2-Y, 1-Z  |
|              | Cg8 $\cdots$ Cg7               | 3.777(2)          | -X, 2-Y, 1-Z  |
|              | Cg8 $\cdots$ Cg8               | 3.493(2)          | -X, 2-Y, 1-Z  |
|              | Cg9 $\cdots$ Cg10 <sup>a</sup> | 4.2677(17)        | -X, 2-Y, 2-Z  |
|              | Cg10 $\cdots$ Cg9 <sup>a</sup> | 4.2677(17)        | -X, 2-Y, 2-Z  |
|              | Cg10 $\cdots$ Cg10             | 3.5718(18)        | -X, 2-Y, 2-Z  |
|              | Cg11 $\cdots$ Cg3              | 3.5179(19)        | X, Y, Z       |
|              | Cg13 $\cdots$ Cg4              | 3.6149(17)        | X, -1+Y, Z    |
| 250          | Cg3 $\cdots$ Cg11              | 3.553(2)          | X, Y, Z       |
|              | Cg4 $\cdots$ Cg13              | 3.6702(18)        | -1+X, -1+Y, Z |
|              | Cg7 $\cdots$ Cg8               | 3.829(3)          | 1-X, -Y, 1-Z  |
|              | Cg8 $\cdots$ Cg7               | 3.829(3)          | 1-X, -Y, 1-Z  |
|              | Cg8 $\cdots$ Cg8               | 3.513(2)          | 1-X, -Y, 1-Z  |
|              | Cg9 $\cdots$ Cg10 <sup>a</sup> | 4.2192(17)        | 1-X, -Y, 2-Z  |
|              | Cg10 $\cdots$ Cg9 <sup>a</sup> | 4.2192(17)        | 1-X, -Y, 2-Z  |
|              | Cg10 $\cdots$ Cg10             | 3.5725(18)        | 1-X, -Y, 2-Z  |
|              | Cg11 $\cdots$ Cg3              | 3.553(2)          | X, Y, Z       |
|              | Cg13 $\cdots$ Cg4              | 3.6702(18)        | 1+X, 1+Y, Z   |
| 275          | Cg3 $\cdots$ Cg11              | 3.565(2)          | X, Y, Z       |
|              | Cg4 $\cdots$ Cg13              | 3.690(2)          | -1+X, -1+Y, Z |
|              | Cg7 $\cdots$ Cg8               | 3.812(3)          | 1-X, -Y, 1-Z  |
|              | Cg8 $\cdots$ Cg7               | 3.812(3)          | 1-X, -Y, 1-Z  |
|              | Cg8 $\cdots$ Cg8               | 3.560(3)          | 1-X, -Y, 1-Z  |
|              | Cg9 $\cdots$ Cg10              | 4.115(2)          | 1-X, -Y, 2-Z  |
|              | Cg10 $\cdots$ Cg9              | 4.115(2)          | 1-X, -Y, 2-Z  |
|              | Cg10 $\cdots$ Cg10             | 3.580(2)          | 1-X, -Y, 2-Z  |
|              | Cg11 $\cdots$ Cg3              | 3.565(2)          | X, Y, Z       |
|              | Cg13 $\cdots$ Cg4              | 3.690(2)          | 1+X, 1+Y, Z   |

<sup>a</sup> The Cg $\cdots$ Cg distance is slightly longer than the typical value of  $\pi\cdots\pi$  stacking interaction.

**Table S6.** Intermolecular Cg $\cdots$ Cg distances (Å) of **1** (continue)

| <i>T</i> , K      | $\pi\cdots\pi$                  | Cg $\cdots$ Cg, Å | Symmetry code |
|-------------------|---------------------------------|-------------------|---------------|
| 296               | Cg3 $\cdots$ Cg8                | 3.6238(17)        | X, Y, Z       |
|                   | Cg6 $\cdots$ Cg7                | 3.8247(15)        | 1-X, -Y, 1-Z  |
|                   | Cg7 $\cdots$ Cg6                | 3.8247(15)        | 1-X, -Y, 1-Z  |
|                   | Cg7 $\cdots$ Cg7                | 3.6381(14)        | 1-X, -Y, 1-Z  |
|                   | Cg8 $\cdots$ Cg3                | 3.6239(17)        | X, Y, Z       |
| 310               | Cg3 $\cdots$ Cg8                | 3.6290(17)        | X, Y, Z       |
|                   | Cg6 $\cdots$ Cg7                | 3.8247(14)        | 1-X, -Y, 1-Z  |
|                   | Cg7 $\cdots$ Cg6                | 3.8247(14)        | 1-X, -Y, 1-Z  |
|                   | Cg7 $\cdots$ Cg7                | 3.6557(13)        | 1-X, -Y, 1-Z  |
|                   | Cg8 $\cdots$ Cg3                | 3.6290(17)        | X, Y, Z       |
| 325               | Cg3 $\cdots$ Cg8                | 3.6316(17)        | X, Y, Z       |
|                   | Cg6 $\cdots$ Cg7                | 3.8232(14)        | 1-X, -Y, 1-Z  |
|                   | Cg7 $\cdots$ Cg6                | 3.8232(14)        | 1-X, -Y, 1-Z  |
|                   | Cg7 $\cdots$ Cg7                | 3.6681(13)        | 1-X, -Y, 1-Z  |
|                   | Cg8 $\cdots$ Cg3                | 3.6316(17)        | X, Y, Z       |
| 340               | Cg3 $\cdots$ Cg8                | 3.6374(19)        | X, Y, Z       |
|                   | Cg6 $\cdots$ Cg7                | 3.8245(15)        | 1-X, -Y, 1-Z  |
|                   | Cg7 $\cdots$ Cg6                | 3.8244(15)        | 1-X, -Y, 1-Z  |
|                   | Cg7 $\cdots$ Cg7                | 3.6813(14)        | 1-X, -Y, 1-Z  |
|                   | Cg8 $\cdots$ Cg3                | 3.6375(19)        | X, Y, Z       |
| 360               | Cg3 $\cdots$ Cg13               | 4.128(2)          | X, Y, Z       |
|                   | Cg4 $\cdots$ Cg15               | 3.7417(17)        | -1+X, -1+Y, Z |
|                   | Cg7 $\cdots$ Cg8                | 3.7000(16)        | 1-X, -Y, 1-Z  |
|                   | Cg8 $\cdots$ Cg7                | 3.7000(16)        | 1-X, -Y, 1-Z  |
|                   | Cg8 $\cdots$ Cg8                | 3.7531(14)        | 1-X, -Y, 1-Z  |
|                   | Cg9 $\cdots$ Cg10               | 3.9641(16)        | 1-X, -Y, 2-Z  |
|                   | Cg10 $\cdots$ Cg9               | 3.9640(16)        | 1-X, -Y, 2-Z  |
|                   | Cg10 $\cdots$ Cg10 <sup>a</sup> | 4.2545(16)        | 1-X, -Y, 2-Z  |
|                   | Cg13 $\cdots$ Cg3               | 4.128(2)          | X, Y, Z       |
| Cg15 $\cdots$ Cg4 | 3.7417(17)                      | 1+X, 1+Y, Z       |               |

<sup>a</sup> The Cg $\cdots$ Cg distance is slightly longer than the typical value of  $\pi\cdots\pi$  stacking interaction.

**Table S7.** Intermolecular CH $\cdots$ O contacts of **1**

| <i>T</i> , K | C–H $\cdots$ X                   | H $\cdots$ X, Å | C $\cdots$ X, Å       | C–H $\cdots$ X, ° | Symmetry code |
|--------------|----------------------------------|-----------------|-----------------------|-------------------|---------------|
| 100          | C15–H15 $\cdots$ O2              | 2.60            | 3.495(4)              | 158               | –X, 2–Y, 1–Z  |
|              | C35–H35 $\cdots$ O1 <sup>a</sup> | 3.060           | 3.935(3) <sup>a</sup> | 154               |               |
| 175          | C15–H15 $\cdots$ O2              | 2.64            | 3.537(4)              | 159               | –X, 2–Y, 1–Z  |
|              | C35–H35 $\cdots$ O1 <sup>a</sup> | 3.051           | 3.932(3)              | 155               |               |
| 250          | C15–H15 $\cdots$ O2              | 2.70            | 3.590(5)              | 159               | 1–X, –Y, 1–Z  |
|              | C35–H35 $\cdots$ O1 <sup>a</sup> | 3.059           | 3.933(5)              | 155               |               |
| 275          | C15–H15 $\cdots$ O2              | 2.71            | 3.596(7)              | 159               | 1–X, –Y, 1–Z  |
|              | C35–H35 $\cdots$ O1              | 2.988           | 3.862(6)              | 157               |               |
| 296          | C15–H15 $\cdots$ O1              | 2.74            | 3.625(3)              | 158               | X, –Y, –1/2+Z |
| 310          | C15–H15 $\cdots$ O1              | 2.75            | 3.628(3)              | 158               | X, –Y, –1/2+Z |
| 325          | C15–H15 $\cdots$ O1              | 2.75            | 3.628(3)              | 158               | X, –Y, –1/2+Z |
| 340          | C15–H15 $\cdots$ O1              | 2.76            | 3.635(3)              | 157               | X, –Y, –1/2+Z |
| 360          | C15–H15 $\cdots$ O2              | 2.65            | 3.531(4)              | 158               | 1–X, –Y, 1–Z  |
|              | C35–H35 $\cdots$ O1              | 2.79            | 3.573(4)              | 143               | 1–X, –Y, 2–Z  |

<sup>a</sup> The contact distance is slightly longer than the typical value of C–H $\cdots$ O hydrogen bond.

**Table S8.** Intermolecular CH $\cdots\pi$  hydrogen bond geometries of **1**

| <i>T</i> , K | C–H $\cdots\pi$        | H $\cdots$ Cg, Å | C $\cdots$ Cg, Å | C–H $\cdots$ Cg, ° | Symmetry code       |
|--------------|------------------------|------------------|------------------|--------------------|---------------------|
| 100          | C4–H4B $\cdots$ Cg3    | 3.00             | 3.634(3)         | 123                | X, Y, Z             |
|              | C7–H7 $\cdots$ Cg14    | 2.55             | 3.467(3)         | 163                | X, Y, Z             |
|              | C25–H25B $\cdots$ Cg8  | 2.68             | 3.620(3)         | 159                | 1–X, 2–Y, 1–Z       |
|              | C25–H25B $\cdots$ Cg11 | 2.62             | 3.561(3)         | 159                | 1–X, 2–Y, 1–Z       |
|              | C27–H27 $\cdots$ Cg16  | 2.38             | 3.328(3)         | 179                | X, 1+Y, Z           |
|              | C33–H33 $\cdots$ Cg16  | 2.82             | 3.673(3)         | 150                | 1–X, 1–Y, 2–Z       |
| 175          | C7–H7 $\cdots$ Cg12    | 2.54             | 3.465(3)         | 165                | X, Y, Z             |
|              | C25A–H25A $\cdots$ Cg8 | 2.72             | 3.656(6)         | 157                | 1–X, 2–Y, 1–Z       |
|              | C27–H27 $\cdots$ Cg14  | 2.40             | 3.351(3)         | 177                | X, 1+Y, Z           |
|              | C33–H33 $\cdots$ Cg14  | 2.86             | 3.713(3)         | 150                | 1–X, 1–Y, 2–Z       |
|              | C25B–H25C $\cdots$ Cg7 | 2.72             | 3.638(14)        | 154                | 1–X, 2–Y, 1–Z       |
| 250          | C7–H7 $\cdots$ Cg12    | 2.55             | 3.476(3)         | 167                | X, Y, Z             |
|              | C25A–H25A $\cdots$ Cg8 | 2.77             | 3.687(8)         | 155                | –X, –Y, 1–Z         |
|              | C27–H27 $\cdots$ Cg14  | 2.45             | 3.391(3)         | 175                | –1+X, –1+Y, Z       |
|              | C33–H33 $\cdots$ Cg14  | 2.92             | 3.776(4)         | 152                | 1–X, 1–Y, 2–Z       |
|              | C25B–H25C $\cdots$ Cg7 | 2.74             | 3.651(11)        | 155                | –X, –Y, 1–Z         |
| 275          | C7–H7 $\cdots$ Cg12    | 2.57             | 3.484(4)         | 168                | X, Y, Z             |
|              | C25A–H25A $\cdots$ Cg8 | 2.82             | 3.724(10)        | 156                | –X, –Y, 1–Z         |
|              | C27–H27 $\cdots$ Cg14  | 2.49             | 3.413(5)         | 175                | –1+X, –1+Y, Z       |
|              | C33–H33 $\cdots$ Cg14  | 2.96             | 3.813(5)         | 152                | 1–X, 1–Y, 2–Z       |
| 296          | C25B–H25C $\cdots$ Cg7 | 2.73             | 3.637(13)        | 156                | –X, –Y, 1–Z         |
|              | C5–H5A $\cdots$ Cg6    | 2.97             | 3.855(7)         | 152                | 1/2+X, 1/2–Y, 1/2+Z |
|              | C7–H7 $\cdots$ Cg9     | 2.54             | 3.456(3)         | 170                | X, Y, Z             |
|              | C2B–H2BB $\cdots$ Cg8  | 2.99             | 3.77(3)          | 138                | 3/2–X, 1/2–Y, 2–Z   |
| 310          | C5–H5A $\cdots$ Cg6    | 2.98             | 3.863(7)         | 152                | 1/2+X, 1/2–Y, 1/2+Z |
|              | C7–H7 $\cdots$ Cg9     | 2.55             | 3.464(3)         | 170                | X, Y, Z             |
|              | C2B–H2BB $\cdots$ Cg8  | 2.98             | 3.79(3)          | 142                | 3/2–X, 1/2–Y, 2–Z   |
| 325          | C5–H5A $\cdots$ Cg6    | 2.97             | 3.865(7)         | 153                | 1/2+X, 1/2–Y, 1/2+Z |
|              | C7–H7 $\cdots$ Cg9     | 2.55             | 3.471(3)         | 170                | X, Y, Z             |
| 340          | C5–H5A $\cdots$ Cg6    | 2.97             | 3.874(7)         | 155                | 1/2+X, 1/2–Y, 1/2+Z |
|              | C7–H7 $\cdots$ Cg9     | 2.57             | 3.485(3)         | 170                | X, Y, Z             |
| 360          | C5–H5B $\cdots$ Cg12   | 2.90             | 3.823(7)         | 158                | 1–X, 1–Y, 2–Z       |
|              | C7–H7 $\cdots$ Cg14    | 2.87             | 3.748(3)         | 158                | X, Y, Z             |
|              | C13–H13 $\cdots$ Cg14  | 2.96             | 3.772(3)         | 146                | 1–X, 1–Y, 1–Z       |
|              | C27–H27 $\cdots$ Cg16  | 2.68             | 3.587(3)         | 166                | –1+X, –1+Y, Z       |

## References

- S1 P. Guionneau, M. Marchivie, G. Bravic, J.-F. Létard and D. Chasseau, *Top. Curr. Chem.*, 2004, **234**, 97–128.
- S2 R. Ketkaew, Y. Tantirungrotechai, P. Harding, G. Chastanet, P. Guionneau, M. Marchivie and D. J. Harding, *Dalton Trans.*, 2021, **50**, 1086–1096.
- S3 M. Marchivie, P. Guionneau, J.-F. Létard and D. Chasseau, *Acta Crystallogr., Sect. B: Struct. Sci.*, 2005, **61**, 25–28.
- S4 O. V. Dolomanov, L. J. Bourhis, R. J. Gildea, J. A. K. Howard and H. Puschmann, *J. Appl. Crystallogr.*, 2009, **42**, 339–341.
- S5 A. L. Spek, PLATON, A multipurpose Crystallographic Tool, 2011, Utrecht University, Utrecht, The Netherlands: A. L. Spek, *Acta Cryst.*, 2009, **D65**, 148–155.
